# Supplementary material for: mRNA COVID-19 vaccine booster fosters B- and T-cell responses in immunocompromised patients
Source: Life Sci Alliance. 2022 Feb 15;5(6):e202201381. doi: 10.26508/lsa.202201381 (PMC8860093; doi:10.26508/lsa.202201381)
Supplement: Supplementary file 2 [file LSA-2022-01381_SdataF3.xlsx]

## Sheet: Fig3A
IgG serum level (BAU/ml)
	0 - T3	1 - T3	2 -T3	0 - T4	1 - T4	2 - T4
Rheumatic	3470			16900
	651
	1690			16900
	1200			2180
	1370			7450
	358			17600
	557
	5350
	2030
		1250			5390
		979			4560
		2750
		1910
		1100			2900
		2760
		1280			3740
		1650			11500
		1730
		1610			12000
		964			13000
		1890			11100
		619			7470
		783
		732
		1310
		1720			7930
		2770			29600
		1490			8690
		2550
		1370			11700
		2470			9040
		4670
		1490
		3210
			41.4			1430
			537			12500
			46.7			1560
			199			1500
			667			17600
			53.4			1420
			136			41600
			1150
			123
			105			3060
			375			461
			4.81			4.81
			20.8			1470
Cancer	281			14800
	199			1340
		6.96			11600
		51.9			6510
			4.81			4.81
			4.81			4.81
			4.81
			53.8			4.81
			4.81
Hemodialysis	301			1700
	229			1650
	371			6910
	134			1610
	75.9			1580
	49.3			3640
	210			1480
	221
	891			4840
	1210			3160
	1260			8590
	1050			6290
		1130
		1080			41600
		82.6			23800
		166			1760
		33.8			340
		7.18			173
		687			6010
		329			16300
		1800			34700
		144			4410
		121			1830
		191			5770
		109
		1230			20300
		402			20400
		1130			4640
			1060			18500
			16.1			89
			4.81			271
			634			7330
			8.4
			219			1820
			7.44			964
			47.7			54.2
			4.81
			15.7			338
			33.2			1700
			139			9260
			29.9			134
			46.1			635
			125			4380
			106			2460
			395			9480
			63.5			7210
			1110			3280
			4.81			4.81

## Sheet: Fig3B
% Neutralization
	0 - T3	1 - T3	2 -T3	0 - T4	1 - T4	2 - T4
Rheumatic	96.9			96.93
	93.2
	96.9			97.21
	93.2			97.21
	96.4			97.16
	72.7			97.16
	89.7
	97
	97.3
		93.7			97.27
		92.7			97.33
		97.1
		96.8
		90			92.21
		97.3
		95.1			96.02
					97.21
		96.1
		94.2			97.33
		93.5			97.33
		96.3			97.16
		89.3			97.1
		78.8
		70.7
		87.8
		93.5			97.21
		97			97.38
		95.5			97.33
		95.7
		90.8			97.21
		96.6			97.38
		97.1
		84.2
		97.2
			18.5			97.16
			72.4			97.21
			44.9			94.08
			76.9			86.12
			86.2			97.33
			9.9			97.04
			39.9			96.87
			85.2
			40.7
			45.7			96.76
			59.7			54.72
			3.2			30.15
			10.3			97.16
Cancer	54.7			97.21
	46			97.1
		3.9			85.32
		18.9			97.33
			1.2
			8.9			8.76
			6.8			11.66
			38.6
			2.7			7.34
Hemodialysis	35.33			99.34
	82.87			99.25
	66.99			99.51
	22.99			99.41
	38.3			99.25
	42.57			99.27
	70.16			99.46
	59.91
	80.42			99.43
	91.83			99.37
	93.07			99.42
	91.83			99.47
		90.05
		55.12			99.46
		28.14			99.45
		32.99			99.32
		7.52			99.05
		0			85.79
		82.97			99.32
		50.79			99.53
		74.54			99.5
		49.18			99.49
		31.89			99.4
		48.29			99.43
		36.42
		89.74			99.52
		73.81			99.43
		79.74			99.36
			91.04			99.51
			5.44			43.74
			5.86			90.47
			80.27			99.33
			9.5
			78.96			99.48
			9.35			77.65
			3.93			0
			9.61
			13.72			96.38
			8.2			99.16
			32.52			99.48
			11.9			10.52
			37.88			98.19
			53.35			99.48
			39.08			99.51
			72.51			99.44
			42.93			99.46
			53.03			99.49
			11.85			0

## Sheet: Fig3C
Ag1, IU/ml
	0 - T3	1 - T3	2 -T3	0 - T4	1 - T4	2 - T4
Rheumatic	0.22			0.84
	0.02
	0.07			0.14
	0.11			0.35
	0.64			0.11
	0.02			0.06
	0.56
	1
	1.63
		0.11			0.34
		0.13			0.43
		0.9
		0.53
		0.42			1.53
		9.76
		0.5			0.85
		0.37			0.53
		2.53
					2
		0.11			0.73
		0.7			1.54
		0.17			0.68
		0.16
		0.7
		0.04
		0.59			0.74
		1.06			9.96
		0.43			2.4
		1.32
		0.06			0.08
		3.92			7.22
		1.38
		0.27
		1.42
			0.23			1.46
			0.44			1.53
			0.65			1.01
			0.04			0.24
			1.26			4.83
			0.93			3.86
			0.12			1.6
			0.79
			0
			0.04			0.07
			0.5			0.56
			0.01			0.01
			1.15			2.85
Cancer	0.33			0.25
	0.07			0.51
		0.02			1.15
		3			0.99
			0			0.07
			0.06			4.37
			4.85
			0			0
			0.01
Hemodialysis	0.02			0.02
	0.39			1.94
	0.11			0.87
	0			0.16
	0.01			0.53
	0.11			1.44
	2.2			6.16
	0
	1.7			2.5
	0.19			2.13
	0.15			0.48
	0.54			2.33
		0
		0			0.02
		0.02
		0.04			0.14
		0.01			0.06
		0			0.08
		0.84			0.93
		0.2			0.4
		0.02			0.06
		0.07			0.19
		0.01			0.15
		0.1			0.73
		0.03
		0.05			0.06
		5.73			4.09
		4.36			7.03
			0.5			0.48
			0			0.06
			0			0.05
			0.11			0.55
			0
			0.08			0.03
			0			0.01
			0			0
			0
			0			0.01
			0.02			0.08
			0.59			0.95
			0.02			0.07
			0			0.27
			0.17			1.4
			0			0.72
			0.24			0.83
			0.09			2.16
			0.17			1.98
			0.64			1.38

## Sheet: Fig3D
Ag2, IU/ml
	0 - T3	1 - T3	2 -T3	0 - T4	1 - T4	2 - T4
Rheumatic	0.41			1.03
	0.04
	0.17			0.43
	0.11			0.34
	0.99			0.24
	0.03			0.07
	0.83
	1.04
	1.96
		0.16			0.64
		0.34			0.71
		1.15
		0.63
		0.5			2.49
		9.76
		0.57			1.07
					1.4
		4.15
		0.63			2.05
		0.09			0.69
		0.91			2.7
		0.14			0.94
		0.36
		1.16
		0.07
		0.64			0.95
		1.37			9.96
		0.6			4.47
		0.88
		0.05			0.08
		4.31			5.97
		2.57
		1.01
		0.16
			0.41			2.54
			0.5			1.54
			0.76			1.08
			0.04			0.33
			1.58			5.76
			1.07			4.12
			0.16			2.09
			1.74
			0.01
			0.03			0.07
			0.62			0.63
			0.01			0
			1.33			2.7
Cancer	0.44			0.26
	0.21			0.71
		0.04			4.04
		0.11			1.67
			0.01			0.13
			0.07			7.37
			4.13
			0			0
			0.01
Hemodialysis	0.03			0.04
	0.51			3.41
	0.22			1.48
	0.07			0.23
	0.01			0.71
	0.09			1.78
	3.76			9.8
	0
	2.67			4.45
	0.35			3.34
	0.25			0.83
	0.33			1.93
		0.36
		0			0.04
		0.02
		0.02			0.19
		0.02			0.06
		0.02			0.03
		1.24			0.79
		0.93			2.01
		0.08			0.17
		0.18			0.27
		0.02			0.36
		0.11			1.39
		0.04
		0.05			0.1
		3.22			2.69
		4.03			9.28
			0.36			0.9
			0			0.34
			0			0.03
			0.27			0.52
			0
			0.15			0.04
			0.07			0.05
			0			0
			0
			0.02			0.01
			0.87			1.4
			0.86			0.99
			0			0.09
			0			0.4
			0.42			1.87
			0			0.89
			0.9			1.1
			0.07			2.23
			0.32			3.63
			0.8			2.39
