# Supplementary material for: mRNA COVID-19 vaccine booster fosters B- and T-cell responses in immunocompromised patients
Source: Life Sci Alliance. 2022 Feb 15;5(6):e202201381. doi: 10.26508/lsa.202201381 (PMC8860093; doi:10.26508/lsa.202201381)
Supplement: Supplementary file 3 [file LSA-2022-01381_SdataF4.xlsx]

## Sheet: Fig4A
Category 0			Category 1			Category 2
IgG serum levels, BAU/ml	% neutralization		IgG serum levels, BAU/ml	% neutralization		IgG serum levels, BAU/ml	% neutralization
3470	96.9		1250	93.7		41.4	18.5
651	93.2		979	92.7		537	72.4
1690	96.9		2750	97.1		46.7	44.9
1200	93.2		1910	96.8		199	76.9
1370	96.4		1100	90		667	86.2
358	72.7		2760	97.3		53.4	9.9
557	89.7		1280	95.1		136	39.9
5350	97					1150	85.2
2030	97.3		1730	96.1		123	40.7
			1610	94.2		105	45.7
199	54.7		964	93.5		375	59.7
281	46		1890	96.3		4.81	3.2
			619	89.3		20.8	10.3
301	35.33		783	78.8
229	82.87		732	70.7		4.81	1.2
371	66.99		1310	87.8		4.81	8.9
134	22.99		1720	93.5		4.81	6.8
75.9	38.3		2770	97		53.8	38.6
49.3	42.57					4.81	2.7
210	70.16		1490	95.5
221	59.91		2550	95.7		1060	91.04
891	80.42		1370	90.8		16.1	5.44
1210	91.83		2470	96.6		4.81	5.86
1260	93.07		4670	97.1		634	80.27
1050	91.83		1490	84.2		8.4	9.5
			3210	97.2		219	78.96
						7.44	9.35
						47.7	3.93
			6.96	3.9		4.81	9.61
			51.9	18.9		15.7	13.72
						33.2	8.2
			1130	90.05		139	32.52
			1080	55.12		29.9	11.9
			82.6	28.14		46.1	37.88
			166	32.99		125	53.35
			33.8	7.52		106	39.08
			7.18	0		395	72.51
			687	82.97		63.5	42.93
			329	50.79		1110	53.03
			1800	74.54		4.81	11.85
			144	49.18
			121	31.89
			191	48.29
			109	36.42
			1230	89.74
			402	73.81
			1130	79.74

## Sheet: Fig4B
Category 0			Category 1			Category 2
IgG serum levels, BAU/ml	% neutralization		IgG serum levels, BAU/ml	% neutralization		IgG serum levels, BAU/ml	% neutralization
16900	96.93		5390	97.27		1430	97.16
16900	97.21		4560	97.33		12500	97.21
2180	97.21					1560	94.08
7450	97.16					1500	86.12
17600	97.16		2900	92.21		17600	97.33
						1420	97.04
			3740	96.02		41600	96.87
			11500	97.21
			12000	97.33		3060	96.76
14800	97.21		13000	97.33		461	54.72
1340	97.1		11100	97.16		4.81	30.15
			7470	97.1		1470	97.16
1700	99.34
1650	99.25					4.81	8.76
6910	99.51					4.81	11.66
1610	99.41		7930	97.21
1580	99.25		29600	97.38		4.81	7.34
3640	99.27
1480	99.46		8690	97.33		18500	99.51
						89	43.74
4840	99.43		11700	97.21		271	90.47
3160	99.37		9040	97.38		7330	99.33
8590	99.42
6290	99.47					1820	99.48
						964	77.65
						54.2	0
			11600	85.32		338	96.38
			6510	97.33		1700	99.16
						9260	99.48
			41600	99.46		134	10.52
			23800	99.45		635	98.19
			1760	99.32		4380	99.48
			340	99.05		2460	99.51
			173	85.79		9480	99.44
			6010	99.32		7210	99.46
			16300	99.53		3280	99.49
			34700	99.5		4.81	0
			4410	99.49
			1830	99.4
			5770	99.43
			20300	99.52
			20400	99.43
			4640	99.36
